# Supplementary material for: Diarrhea, Helminth Infection, Dehydration, and Malnutrition Associated with Water, Sanitation, and Hygiene Facilities and Poor Handwashing in Schools in Metro Manila, Philippines: A Cross-Sectional Study
Source: bioRxiv or medRxiv preprint supplement (doi:10.1101/2020.12.13.20248141), 2020-12-14
Supplement: Supplementary file [file media-2.pdf]

## **Unpublished Supplemental Material**

### **Diarrhea, Helminth Infection, and Malnutrition Associated with Water, Sanitation, and Hygiene Facilities and Poor Handwashing in Schools in Metro Manila, Philippines: A Cross-Sectional Study**

Stephanie O. Sangalang, Nelissa O. Prado, Allen Lemuel G. Lemence, Mylene G. Cayetano, Jinky Leilanie DP. Lu, John Cedrick Valencia, Thomas Kistemann, and Christian Borgemeister

#### **Table of Contents**

**Table S1.** Questions from children's health examination.

**Table S2.** Questions from school principal's interview.

**Table S3.** Questions from school restroom inspection.

**Table S4.** Questions from parent's interview.

**Table S5.** Questions from home restroom inspection.

**Table S6.** Expanded table of main sample descriptives of demographic, health, and hygiene-related factors of students from main sample and WaSH-related structural factors of schools.

**Table S7.** Prevalence rates of health outcomes--diarrhea only, STH infection only, diarrhea and STH infection, stunting only, undernutrition only, and over-nutrition only--by school.

**Table S1.** Questions from children's health examination

| Number | Question                            |
|--------|-------------------------------------|
| 1      | ID                                  |
| 2      | Date of birth                       |
| 3      | Telephone number                    |
| 4      | Height (m)                          |
| 5      | Weight (kg)                         |
| 6      | Urine pH                            |
| 7      | Urine Specific Gravity              |
| 8      | Urine Glucose                       |
| 9      | Urine Protein                       |
| 10     | Do you have any questions/comments? |
| 11     | Research ID                         |

**Table S2.** Questions from school principal's interview

| Number | Question                                                                                                                                |
|--------|-----------------------------------------------------------------------------------------------------------------------------------------|
| 1      | What is today's date?                                                                                                                   |
| 2      | What is the name of your school?                                                                                                        |
| 3      | What is your name?                                                                                                                      |
| 4      | What is your telephone / cellphone number?                                                                                              |
| 5      | What is your email address?                                                                                                             |
| 6      | How many students are enrolled in the school?                                                                                           |
| 7      | How many male students are enrolled?                                                                                                    |
| 8      | How many female students are enrolled?                                                                                                  |
| 9      | How many students have a physical handicap (e.g. cannot walk or is blind)?                                                              |
| 10     | Which grade levels are taught at the school (e.g. grades 1-6 or grades 9-12)?                                                           |
| 11     | Is there a school policy to clean the students' restrooms at least once per day?                                                        |
| 12     | Is there someone who is assigned to cleaning the students' restrooms? (e.g. janitor or cleaning lady)                                   |
| 13     | Is there someone who is assigned to making sure that the cleaning policy is enforced? (e.g. sanitation officer or administrative staff) |
| 14     | Is there a school policy for repairing broken parts in the students' restrooms?                                                         |
| 15     | Is there someone assigned to checking if there are broken parts in the students' restrooms at least once per month?                     |
| 16     | Is hygiene taught in the school curriculum?                                                                                             |
| 17     | Is hand washing taught in the school curriculum?                                                                                        |
| 18     | Are students allowed to report any issues/concerns/problems with the students' restrooms?                                               |
| 19     | Is there someone assigned to address students' issues/concerns/problems with the students' restrooms?                                   |
| 20     | Are you satisfied with the sanitation in the students' restrooms?                                                                       |
| 21     | Are you satisfied with the hygiene behaviors of the students?                                                                           |
| 22     | Do you have any other questions or comments?                                                                                            |

**Table S3.** Questions from school restroom inspection

| Number | Question                                                                                                       |
|--------|----------------------------------------------------------------------------------------------------------------|
| 1      | What is the name of the school?                                                                                |
| 2      | What is the date of inspection?                                                                                |
| 3      | Restroom code                                                                                                  |
| 4      | Is this restroom for males only?                                                                               |
| 5      | Is this restroom NOT coed (for both males and females)?                                                        |
| 6      | Is the restroom clean?                                                                                         |
| 7      | Is the restroom without a bad smell?                                                                           |
| 8      | Is the restroom well-lit (that is, not too dark)?                                                              |
| 9      | Is the restroom light working?                                                                                 |
| 10     | Is there place to wash hands in the same room?                                                                 |
| 11     | What type of handwashing facilities are there in/ near this restroom?                                          |
| 12     | Is there water to wash hands?                                                                                  |
| 13     | Is there soap to wash hands?                                                                                   |
| 14     | Is there a towel or paper to dry hands?                                                                        |
| 15     | Is there toilet paper?                                                                                         |
| 16     | Is the floor dry?                                                                                              |
| 17     | Is there a door that locks for each toilet cabin?                                                              |
| 18     | Is there a wall separation for privacy of each toilet cabin?                                                   |
| 19     | Is the wall or separation high enough to provide privacy?                                                      |
| 20     | For male restrooms, are there partitions between urinals?                                                      |
| 21     | Are there NO signs of graffiti?                                                                                |
| 22     | Are there NO signs of damage (e.g. leaky pipes, cracked walls, open ceilings, peeling paint, flaking plaster)? |
| 23     | Are there NO signs of mold?                                                                                    |
| 24     | Type of toilet                                                                                                 |
| 25     | If it is a flush or pour-flush toilet, then where does the wastewater flow to? (see attached guide)            |
| 26     | Do ALL of the toilets flush? (if a toilet is marked as “out of order,” then no need to check)                  |
| 27     | If it is a dry toilet, then what type of toilet is it? (see attached guide)                                    |
| 28     | Are there NO flies?                                                                                            |
| 29     | Is there a garbage can inside?                                                                                 |
| 30     | Number of toilet bowls                                                                                         |
| 31     | Number of urinals                                                                                              |
| 32     | Number of handwashing basins                                                                                   |
| 33     | Distance between two (2) urinals (m)                                                                           |
| 34     | Distance from toilet/urinal and nearest handwashing basin (m)                                                  |
| 35     | If there is a urinal wall present, then how long (cm) is it? Write "N/A" if there is no urinal wall.           |
| 36     | Length of the urinal partition (cm)                                                                            |
| 37     | Width of the urinal partition (cm)                                                                             |
| 38     | How many photos did you take?                                                                                  |
| 39     | Did you collect a water specimen?                                                                              |

40 Did you notice anything else that you wish to document?

**Table S4.** Questions from parent's interview

| Number | Question                                                                                               |
|--------|--------------------------------------------------------------------------------------------------------|
| 1      | What is today's date?                                                                                  |
| 2      | What is the name of the student (First and Last Name)?                                                 |
| 3      | What is the date of birth of the student?                                                              |
| 4      | What is the name of your child's school?                                                               |
| 5      | What is the name of the parent (First and Last Name)?                                                  |
| 6      | How many people live in the home?                                                                      |
| 7      | How many adults live in the home?                                                                      |
| 8      | How many children live in the home?                                                                    |
| 9      | How long (years) have you lived in the home?                                                           |
| 10     | Is there enough food to eat for everyone in your home for most days?                                   |
| 11     | Are there enough places near your home where you can buy food?                                         |
| 12     | Are the prices of the food affordable?                                                                 |
| 13     | Have you NEVER experienced a time when you wanted to eat but had no food or could not get to buy food? |
| 14     | Have you and your family NEVER had to ask for food?                                                    |
| 15     | Do you RARELY feel extreme hunger?                                                                     |
| 16     | Do you eat a variety of food (e.g. fruits, vegetables, meat, rice) on most days?                       |
| 17     | Do you cook more often than buy already prepared food?                                                 |
| 18     | Do you have water that is safe for drinking?                                                           |
| 19     | Do you have enough water so everyone can drink?                                                        |
| 20     | Does the person who cooks for the family wash his/her hands before cooking?                            |
| 21     | Does he/she wash the fruits/vegetables before cooking them?                                            |
| 22     | Do you have any other questions or comments?                                                           |

**Table S5.** Questions from home restroom inspection

| Number | Question                                                                                   |
|--------|--------------------------------------------------------------------------------------------|
| 1      | Date of inspection                                                                         |
| 2      | Home address                                                                               |
| 3      | Student's name                                                                             |
| 4      | Student's date of birth                                                                    |
| 5      | Student ID                                                                                 |
| 6      | Name of School                                                                             |
| 7      | Is the restroom inside the house?                                                          |
| 8      | Is the restroom clean?                                                                     |
| 9      | Is the restroom without a bad smell?                                                       |
| 10     | Is there a restroom light?                                                                 |
| 11     | Is the restroom light working? (e.g., light bulb, bottle light, etc.)                      |
| 12     | Is the restroom well-lit (that is, not too dark)?                                          |
| 13     | Is there a place to wash the hands in the same room?                                       |
| 14     | Is there water to wash the hands?                                                          |
| 15     | Is there soap to wash the hands?                                                           |
| 16     | Is there towel or paper to dry the hands?                                                  |
| 17     | Is there toilet paper?                                                                     |
| 18     | Is the floor dry?                                                                          |
| 19     | Is there a door for the toilet that locks?                                                 |
| 20     | Is the toilet an example of "improved sanitation"? (e.g. flush toilet instead of open pit) |
| 21     | Is it a flush toilet?                                                                      |
| 22     | Does the toilet flush?                                                                     |
| 23     | Is there a septic tank for the toilet?                                                     |
| 24     | Are there NO signs of damage? (e.g. leaky pipes, cracked walls)                            |
| 25     | Are there NO signs of mold?                                                                |
| 26     | Is there a garbage can nearby?                                                             |
| 27     | Number of toilet bowls                                                                     |
| 28     | Number of handwashing basins                                                               |
| 29     | Distance from toilet to nearest handwashing basin (in meters)                              |

**Table S6.** Expanded table of main sample descriptives of demographic, health, and hygiene-related factors of students ( $N = 1,558$ ) from main sample and WaSH-related structural factors of schools ( $N = 15$ )

|                                                                             | <i>n</i> | % (95% CI)           |
|-----------------------------------------------------------------------------|----------|----------------------|
| Student factors ( $N=1,588$ )                                               |          |                      |
| WaSH-related knowledge (self-reported)                                      |          |                      |
| Students may not complain about the “bad” condition of school restroom      | 312      | 21.0 (18.9, 23.1)    |
| Does not know if students may complain or not                               | 626      | 42.1 (39.6, 44.6)    |
| School staff does not respond to students’ complaints about school restroom | 280      | 18.8 (16.8, 20.8)    |
| Does not know if school staff responds to complaints or not                 | 589      | 39.6 (37.1, 42.1)    |
| Health history and nutrition (self-reported)                                |          |                      |
| Has been hospitalized (ever)                                                | 211      | 14.2 (12.4, 16.0)    |
| Has had surgery (ever)                                                      | 72       | 4.8 (3.7, 5.9)       |
| Eats 3 meals per day                                                        | 1,394    | 94 (92.7, 95.2)      |
| It is “rare” to feel extremely hungry                                       | 1,162    | 78.4 (76.2, 80.4)    |
| Experienced being too hungry to focus at school                             | 242      | 16.3 (14.4, 18.2)    |
| Experienced being too hungry to sleep                                       | 199      | 13.4 (11.7, 15.1)    |
| Health outcomes                                                             |          |                      |
| Had illness (self-reported)                                                 |          |                      |
| No diarrhea and no STH infection                                            | 617      | 41.9 (39.3, 44.4)    |
| Diarrhea but no STH infection                                               | 212      | 14.4 (12.6, 16.3)    |
| STH infection but no diarrhea                                               | 438      | 29.7 (27.4, 32.1)    |
| Both diarrhea and STH infection                                             | 207      | 14.0 (12.3, 15.9)    |
| Had diarrhea 1 - 3 days last month                                          | 374      | 25.3 (23.1, 27.6)    |
| Hospitalized for diarrhea 1 - 3 days last month                             | 91       | 6.1 (5.0, 7.5)       |
| Malnutrition <sup>a</sup> and acute dehydration <sup>b</sup> (observed)     |          |                      |
| No stunting and no undernutrition                                           | 1165     | 78.8 (76.6, 80.9)    |
| Stunting but no undernutrition                                              | 186      | 12.6 (10.9, 14.4)    |
| Undernutrition but no stunting                                              | 87       | 5.9 (4.7, 7.2)       |
| Both stunting and undernutrition                                            | 40       | 2.7 (1.9, 3.7)       |
| No stunting and no over-nutrition                                           | 946      | 64.0 (61.5, 66.5)    |
| Stunting but no over-nutrition                                              | 211      | 14.3 (12.5, 16.2)    |
| Over-nutrition but no stunting                                              | 306      | 20.7 (18.7, 22.9)    |
| Both stunting and over-nutrition                                            | 15       | 1.0 (1.0, 1.7)       |
| Normal weight                                                               | 1030     | 69.7 (67.3, 72.0)    |
| Urine specific gravity (sg), median (IQR)                                   |          | 1.025 (1.015, 1.025) |
| Urine has (any) protein <sup>c</sup>                                        | 360      | 25.7 (23.4, 28.1)    |
| Urine protein, trace                                                        | 346      | 24.7 (22.5, 27.0)    |
| Urine protein, level 1                                                      | 12       | 0.9 (0.4, 1.5)       |
| Urine protein, level 2                                                      | 1        | 0.1 (0.00181, 0.4)   |
| Urine protein, level 3                                                      | 1        | 0.1 (0.00181, 0.4)   |
| Urine has no protein                                                        | 1041     | 74.3 (71.9, 76.6)    |
| School factors ( $N = 15$ )                                                 |          |                      |

|                                                                       |      |                       |
|-----------------------------------------------------------------------|------|-----------------------|
| Facilities (observed)                                                 |      |                       |
| Toilets ( $n = 223$ )                                                 |      |                       |
| Number of male-only toilets, median (IQR)                             |      | 7 (3, 11)             |
| Number of female-only toilets, median (IQR)                           |      | 10 (3, 16)            |
| Number of coed toilets, median (IQR)                                  |      | 2 (2, 5)              |
| Male student-to-male toilet ratio, median (IQR)                       |      | 320.4 (245.1, 401.5)  |
| Female student-to-female toilet ratio, median (IQR)                   |      | 261.2 (182.1, 364.7)  |
| Number of schools that exceeded male student-to male toilet ratio     | 11   | 91.7 (61.5, 99.8)     |
| Number of schools that exceeded female student-to female toilet ratio | 12   | 92.3 (64, 99.8)       |
| Urinals ( $n = 49.5^d$ )                                              |      |                       |
| Number of urinals, median (IQR)                                       |      | 2 (0, 4.9)            |
| Male student-to-urinal ratio, median (IQR)                            |      | 608.6 (407.8, 1624.5) |
| Number of schools that exceeded male student-to urinal ratio          | 8    | 88.9 (51.8, 99.7)     |
| Handwashing basins ( $n = 129$ )                                      |      |                       |
| Number of handwashing basins not near toilet                          | 56   | 45.1 (36.2, 54.3)     |
| Mean distance (m) between handwashing basin and toilet, median (IQR)  |      | 1.8 (0.9, 2.9)        |
| Policies and school principals' perceptions (self-reported)           |      |                       |
| School has a policy to clean school restroom daily                    | 14   | 93.3 (68.1, 99.8)     |
| School has a policy to enforce daily cleaning of school restroom      | 14   | 93.3 (68.1, 99.8)     |
| School principal is not satisfied with students' hygiene              | 7    | 46.7 (21.3, 73.4)     |
| School principal is not satisfied with restrooms' sanitation          | 7    | 46.7 (21.3, 73.4)     |
| Students' perceptions (self-reported)                                 |      |                       |
| Is not satisfied with restroom                                        | 716  | 51.8 (49.2, 54.3)     |
| Restroom lacks cleanliness                                            | 924  | 62.1 (59.7, 64.6)     |
| Restroom provides insufficient privacy                                | 808  | 54.4 (51.9, 57.0)     |
| Restroom is too far away                                              | 114  | 8.2 (6.7, 9.6)        |
| Restroom is not accessible for PWD                                    | 777  | 52.2 (49.7, 54.8)     |
| Restroom has long line to use toilet                                  | 351  | 23.6 (21.4, 25.8)     |
| Number of school restrooms is not sufficient for the number of users  | 495  | 33.3 (30.9, 35.7)     |
| No toilet paper available                                             | 1302 | 87.5 (85.8, 89.2)     |
| Is not satisfied with handwashing basin                               | 259  | 23.8 (21.3, 26.4)     |
| Handwashing basin lacks cleanliness                                   | 335  | 30.8 (28.1, 33.6)     |
| No water available                                                    | 241  | 22.1 (19.7, 24.6)     |
| No soap available                                                     | 848  | 78.1 (75.6, 80.5)     |
| No towel or paper for drying hands                                    | 946  | 87.0 (85.0, 89.0)     |
| No handwashing basin available                                        | 398  | 28.6 (26.2, 30.9)     |

Note: CI = confidence interval; IQR = interquartile range; PWD = person(s) with disabilities; sg = specific gravity; STH = soil-transmitted helminth; WHO = World Health Organization.

<sup>a</sup>Malnutrition as defined by the WHO (Table 1).

<sup>b</sup>Acute dehydration, as exhibited by highly concentrated urine, was defined as urine sg  $\geq 1.020$ .

Sangalang et al. (2020). WaSH in Manila Schools. (Unpublished supplemental material.)

<sup>c</sup>We measured urine protein by using urine test strips (Insight Urinalysis Reagent Strips, Acon Laboratories Inc., San Diego, California, U.S.A.). The urine protein values are as follows: trace/+1 block (20 mg/dL), level 1/+2 blocks (50 mg/dL), level 2/+3 blocks (100 mg/dL), and level 3/+4 blocks (200, 400 mg/dL).

<sup>d</sup>Urinal  $N = 49.5$  includes data from one school wherein no urinals were present in one of the restrooms for male students. However, inside the restroom there was a common area, with running water, where male students could urinate.

**Table S7.** Prevalence rates of health outcomes--diarrhea only, STH infection only, diarrhea and STH infection, stunting only, undernutrition only, and over-nutrition only--by school ( $N = 1,558$ )

| School | City        | Students Surveyed | Diarrhea    |     |                   | STH infection |     |                   | Stunting  |     |                   |
|--------|-------------|-------------------|-------------|-----|-------------------|---------------|-----|-------------------|-----------|-----|-------------------|
|        |             |                   | valid $n^a$ | $n$ | % (95% CI)        | valid $n$     | $n$ | % (95% CI)        | valid $n$ | $n$ | % (95% CI)        |
| 1      | Manila      | 111               | 111         | 40  | 36 (27.1, 45.7)   | 110           | 37  | 33.6 (24.9, 43.3) | 119       | 16  | 13.4 (7.9, 20.9)  |
| 2      | Navotas     | 108               | 106         | 36  | 34 (25, 43.8)     | 106           | 40  | 37.7 (28.5, 47.7) | 108       | 17  | 15.7 (9.4, 24)    |
| 3      | Navotas     | 90                | 90          | 30  | 33.3 (23.7, 44.1) | 90            | 58  | 64.4 (53.7, 74.3) | 89        | 27  | 30.3 (21, 41)     |
| 4      | Navotas     | 105               | 103         | 37  | 35.9 (26.7, 46)   | 103           | 52  | 50.5 (40.5, 60.5) | 105       | 16  | 15.2 (9, 23.6)    |
| 5      | Navotas     | 103               | 80          | 34  | 42.5 (31.5, 54.1) | 80            | 55  | 68.8 (57.4, 78.7) | 103       | 24  | 23.3 (15.5, 32.7) |
| 6      | Navotas     | 99                | 97          | 31  | 32 (22.9, 42.2)   | 97            | 55  | 56.7 (46.3, 66.7) | 98        | 22  | 22.4 (14.6, 32)   |
| 7      | Navotas     | 133               | 120         | 34  | 28.3 (20.5, 37.3) | 119           | 63  | 52.9 (43.6, 62.2) | 132       | 38  | 28.8 (21.2, 37.3) |
| 8      | Quezon City | 116               | 109         | 19  | 17.4 (10.8, 25.9) | 109           | 34  | 31.2 (22.7, 40.8) | 116       | 8   | 6.9 (3, 13.1)     |
| 9      | Quezon City | 103               | 103         | 31  | 30.1 (21.5, 40)   | 103           | 46  | 44.7 (34.9, 54.8) | 103       | 13  | 12.6 (6.9, 20.6)  |
| 10     | Quezon City | 100               | 98          | 16  | 16.3 (9.6, 25.2)  | 97            | 28  | 28.9 (20.1, 39)   | 100       | 5   | 5 (1.6, 11.3)     |
| 11     | Quezon City | 118               | 104         | 21  | 20.2 (13, 29.2)   | 103           | 41  | 39.8 (30.3, 49.9) | 118       | 15  | 12.7 (7.3, 20.1)  |
| 12     | Quezon City | 106               | 106         | 29  | 27.4 (19.1, 36.9) | 106           | 40  | 37.7 (28.5, 47.7) | 106       | 11  | 10.4 (5.3, 17.8)  |
| 13     | Quezon City | 90                | 86          | 24  | 27.9 (18.8, 38.6) | 86            | 27  | 31.4 (21.8, 42.3) | 90        | 5   | 5.6 (1.8, 12.5)   |
| 14     | Quezon City | 82                | 80          | 19  | 23.8 (14.9, 34.6) | 80            | 25  | 31.3 (21.3, 42.6) | 82        | 7   | 8.5 (3.5, 16.8)   |
| 15     | Quezon City | 94                | 85          | 20  | 23.5 (15, 34)     | 94            | 46  | 48.9 (38.5, 59.5) | 36        | 3   | 8.3 (1.8, 22.5)   |
| Total  |             | 1558              | 1478        | 421 |                   | 1483          | 647 |                   | 1505      | 227 |                   |

Note: CI = confidence interval; STH = soil-transmitted helminth.

<sup>a</sup>Excludes missing data.

Sangalang et al. (2020). WaSH in Manila Schools. (Unpublished supplemental material.)

| School | City        | Students<br>Surveyed | Undernutrition |          |                  | Over-nutrition |          |                   |
|--------|-------------|----------------------|----------------|----------|------------------|----------------|----------|-------------------|
|        |             |                      | valid <i>n</i> | <i>n</i> | % (95% CI)       | valid <i>n</i> | <i>n</i> | % (95% CI)        |
| 1      | Manila      | 111                  | 111            | 7        | 6.3 (2.6, 12.6)  | 111            | 35       | 31.5 (23, 41)     |
| 2      | Navotas     | 108                  | 108            | 4        | 3.7 (1, 9.2)     | 108            | 32       | 29.6 (21.2, 39.2) |
| 3      | Navotas     | 90                   | 89             | 11       | 12.4 (6.3, 21)   | 89             | 17       | 19.1 (11.5, 28.8) |
| 4      | Navotas     | 105                  | 105            | 6        | 5.7 (2.1, 12)    | 105            | 16       | 15.2 (9, 23.6)    |
| 5      | Navotas     | 103                  | 103            | 10       | 9.7 (4.8, 17.1)  | 103            | 21       | 20.4 (13.1, 29.5) |
| 6      | Navotas     | 99                   | 98             | 6        | 6.1 (2.3, 12.9)  | 98             | 20       | 20.4 (12.9, 29.7) |
| 7      | Navotas     | 133                  | 132            | 20       | 15.2 (9.5, 22.4) | 132            | 16       | 12.1 (7.1, 18.9)  |
| 8      | Quezon City | 116                  | 116            | 8        | 6.9 (3, 13.1)    | 116            | 29       | 25 (17.4, 33.9)   |
| 9      | Quezon City | 103                  | 103            | 10       | 9.7 (4.8, 17.1)  | 103            | 22       | 21.4 (13.9, 30.5) |
| 10     | Quezon City | 100                  | 100            | 12       | 12 (6.4, 20)     | 100            | 17       | 17 (10.2, 25.8)   |
| 11     | Quezon City | 118                  | 118            | 13       | 11 (6, 18.1)     | 118            | 19       | 16.1 (10, 24)     |
| 12     | Quezon City | 106                  | 106            | 8        | 7.5 (3.3, 14.3)  | 106            | 27       | 25.5 (17.5, 34.9) |
| 13     | Quezon City | 90                   | 90             | 2        | 2.2 (0.2, 7.8)   | 90             | 18       | 20 (12.3, 29.8)   |
| 14     | Quezon City | 82                   | 82             | 7        | 8.5 (3.5, 16.8)  | 82             | 26       | 31.7 (21.9, 42.9) |
| 15     | Quezon City | 94                   | 17             | 3        | 17.6 (3.8, 43.4) | 17             | 6        | 35.3 (14.2, 61.7) |
| Total  |             | 1558                 | 1478           | 127      |                  | 1478           | 321      |                   |

Note: CI = confidence interval; STH = soil-transmitted helminth.

<sup>a</sup>Excludes missing data.
